# Supplementary material
Source: HighWire-hosted journal article supplement (https://www.ajevonline.org/highwire/filestream/12238/field_highwire_adjunct_files/0/SupplementalData.pdf)
Supplement: SupplementalData.pdf [file SupplementalData.pdf]

**Supplemental Data for:**

Copp CR and Levin AD. 2021.

Irrigation improves vine physiology and fruit composition in grapevine red blotch virus-infected *Vitis vinifera* L.

Am J Enol Vitic 72:307-317. doi: 10.5344/ajev.2021.21007.

**Supplemental Table 1** Evaporative demand and water supply. Growing degree days (GDD), reference evapotranspiration (ET<sub>o</sub>), and growing season precipitation are accumulated from 1 April to 30 Sept. Dormant season precipitation is accumulated from 1 Oct of the prior year to 31 March. Applied irrigation quantities are shown for the control (CON) irrigation treatment and are accumulated from irrigation onset to harvest.

| Year | GDD<br>(base 10°C) | ET <sub>o</sub><br>(mm) | Precipitation (mm) |                | Irrigation (mm) |              | Total |
|------|--------------------|-------------------------|--------------------|----------------|-----------------|--------------|-------|
|      |                    |                         | Dormant season     | growing season | Preveraison     | Postveraison |       |
| 2018 | 1608               | 808                     | 98                 | 56             | –               | –            | 77    |
| 2019 | 1424               | 826                     | 204                | 136            | 99              | 41           | 140   |
| 2020 | 1536               | 856                     | 127                | 86             | 43              | 29           | 72    |
| Mean | 1523               | 830                     | 143                | 93             | –               | –            | 96    |

**Supplemental Table 2** Phenology by date and accumulation growing degree days (GDD). GDD are accumulated from 1 April.

| Year | Date     |        |          |         |
|------|----------|--------|----------|---------|
|      | Budbreak | Bloom  | Veraison | Harvest |
| 2018 | 23 April | 3 June | 10 Aug   | 1 Oct   |
| 2019 | 16 April | 6 June | 7 Aug    | 9 Oct   |
| 2020 | 16 April | 2 June | 7 Aug    | 19 Oct  |

  

| Year | GDD (base 10°C) |     |     |      |
|------|-----------------|-----|-----|------|
|      | 2018            | 50  | 319 | 1143 |
| 2019 | 21              | 297 | 936 | 1447 |
| 2020 | 40              | 291 | 945 | 1647 |

**Supplemental Table 3** Total applied nutrients per fertilizer treatment for each year. Quantities are expressed as total elemental mass.

| Year / Fertilizer       | N (kg/ha) | P (kg/ha) | K (kg/ha) |
|-------------------------|-----------|-----------|-----------|
| <b>2018<sup>a</sup></b> |           |           |           |
| CON                     | 12.9      | 1.2       | 11.1      |
| SUPP                    | 25.8      | 2.5       | 22.2      |
| <b>2019</b>             |           |           |           |
| CON                     | 7.0       | 0.7       | 5.8       |
| SUPP                    | 14.0      | 1.4       | 11.7      |
| <b>2020</b>             |           |           |           |
| CON                     | 5.5       | 0.5       | 2.3       |
| SUPP                    | 11.0      | 1.0       | 4.6       |

<sup>a</sup>CON = Control (grower standard); SUPP = Supplemental (2x grower standard).

**Supplemental Table 4** Nutrient status at veraison per treatment and tissue type.

| Year / Irrigation<br>Fertilizer | Petiole |       |       | Blade |       |       |
|---------------------------------|---------|-------|-------|-------|-------|-------|
|                                 | N (%)   | P (%) | K (%) | N (%) | P (%) | K (%) |
| <b>2019 / CON<sup>a</sup></b>   |         |       |       |       |       |       |
| CON                             | –       | –     | –     | 2.10  | 0.14  | 0.34  |
| SUPP                            | –       | –     | –     | 2.27  | 0.14  | 0.37  |
| <b>2019 / SUPP</b>              |         |       |       |       |       |       |
| CON                             | –       | –     | –     | 2.13  | 0.17  | 0.40  |
| SUPP                            | –       | –     | –     | 2.00  | 0.18  | 0.29  |
| <b>2020 / CON</b>               |         |       |       |       |       |       |
| CON                             | 0.88    | 0.12  | 0.53  | 2.99  | 0.17  | 0.50  |
| SUPP                            | 0.82    | 0.14  | 0.70  | 2.93  | 0.17  | 0.43  |
| <b>2020 / SUPP</b>              |         |       |       |       |       |       |
| CON                             | 0.72    | 0.18  | 0.85  | 2.82  | 0.19  | 0.57  |
| SUPP                            | 0.69    | 0.21  | 0.71  | 2.87  | 0.20  | 0.51  |

<sup>a</sup>CON = Control (grower standard); SUPP = Supplemental (2x grower standard).

**Supplemental Data for:**

Copp CR and Levin AD. 2021.

Irrigation improves vine physiology and fruit composition in grapevine red blotch virus-infected *Vitis vinifera* L.

Am J Enol Vitic 72:307-317. doi: 10.5344/ajev.2021.21007.

**Supplemental Table 5** Response of secondary fruit composition per berry at harvest to treatments and year. Data are means  $\pm$  one standard error (n = 4).

| Year/Irrigation Fertilizer  | Anthocyanins (mg/berry) | Skin IRP <sup>a</sup> (mg/berry) | Skin tannins (mg/berry) | Seed IRP (mg/berry) | Seed tannins (mg/berry) |
|-----------------------------|-------------------------|----------------------------------|-------------------------|---------------------|-------------------------|
| <b>2018/CON<sup>b</sup></b> |                         |                                  |                         |                     |                         |
| CON                         | 0.80 $\pm$ 0.05         | 2.05 $\pm$ 0.15                  | 1.26 $\pm$ 0.10         | 3.32 $\pm$ 0.19     | 1.55 $\pm$ 0.07         |
| SUPP                        | 0.73 $\pm$ 0.05         | 1.82 $\pm$ 0.15                  | 1.17 $\pm$ 0.10         | 2.70 $\pm$ 0.19     | 1.44 $\pm$ 0.07         |
| <b>2018/SUPP</b>            |                         |                                  |                         |                     |                         |
| CON                         | 0.58 $\pm$ 0.05         | 1.95 $\pm$ 0.15                  | 1.60 $\pm$ 0.10         | 3.92 $\pm$ 0.19     | 1.93 $\pm$ 0.07         |
| SUPP                        | 0.67 $\pm$ 0.05         | 2.48 $\pm$ 0.15                  | 1.75 $\pm$ 0.10         | 3.12 $\pm$ 0.19     | 1.51 $\pm$ 0.07         |
| <b>2019/CON</b>             |                         |                                  |                         |                     |                         |
| CON                         | 0.98 $\pm$ 0.05         | 2.28 $\pm$ 0.15                  | 0.51 $\pm$ 0.10         | 1.31 $\pm$ 0.19     | 0.58 $\pm$ 0.07         |
| SUPP                        | 1.02 $\pm$ 0.05         | 2.16 $\pm$ 0.15                  | 0.47 $\pm$ 0.10         | 1.32 $\pm$ 0.19     | 0.58 $\pm$ 0.07         |
| <b>2019/SUPP</b>            |                         |                                  |                         |                     |                         |
| CON                         | 1.01 $\pm$ 0.05         | 2.35 $\pm$ 0.15                  | 0.55 $\pm$ 0.10         | 1.84 $\pm$ 0.19     | 0.73 $\pm$ 0.07         |
| SUPP                        | 1.03 $\pm$ 0.05         | 2.72 $\pm$ 0.15                  | 0.71 $\pm$ 0.10         | 1.86 $\pm$ 0.19     | 0.77 $\pm$ 0.07         |
| <b>2020/CON</b>             |                         |                                  |                         |                     |                         |
| CON                         | 0.65 $\pm$ 0.05         | 2.18 $\pm$ 0.15                  | 0.94 $\pm$ 0.10         | 1.75 $\pm$ 0.19     | 1.01 $\pm$ 0.07         |
| SUPP                        | 0.69 $\pm$ 0.05         | 2.40 $\pm$ 0.15                  | 0.86 $\pm$ 0.10         | 1.83 $\pm$ 0.19     | 1.12 $\pm$ 0.07         |
| <b>2020/SUPP</b>            |                         |                                  |                         |                     |                         |
| CON                         | 0.87 $\pm$ 0.05         | 3.70 $\pm$ 0.15                  | 1.07 $\pm$ 0.10         | 2.13 $\pm$ 0.19     | 1.59 $\pm$ 0.07         |
| SUPP                        | 0.87 $\pm$ 0.05         | 3.57 $\pm$ 0.15                  | 1.34 $\pm$ 0.10         | 2.34 $\pm$ 0.19     | 1.59 $\pm$ 0.07         |
| <b>ANOVA<sup>c</sup></b>    |                         |                                  |                         |                     |                         |
|                             |                         |                                  | <b>p values</b>         |                     |                         |
| Irrigation (I)              | 0.417                   | <0.001                           | <0.001                  | 0.001               | <0.001                  |
| Fertilizer (F)              | 0.541                   | 0.295                            | 0.307                   | 0.125               | 0.128                   |
| Year (Y)                    | <0.001                  | <0.001                           | <0.001                  | <0.001              | <0.001                  |
| I * F                       | 0.611                   | 0.154                            | 0.055                   | 0.945               | 0.128                   |
| I * Y                       | <0.001                  | <0.001                           | 0.110                   | 0.932               | 0.002                   |
| F * Y                       | 0.953                   | 0.841                            | 0.907                   | 0.007               | 0.004                   |
| I * F * Y                   | 0.214                   | 0.020                            | 0.862                   | 0.832               | 0.203                   |

<sup>a</sup>IRP = iron-reactive phenolics.

<sup>b</sup>CON = Control (grower standard); SUPP = Supplemental (2x grower standard).

<sup>c</sup>ANOVA = analysis of variance.

**Supplemental Data for:**

Copp CR and Levin AD. 2021.

Irrigation improves vine physiology and fruit composition in grapevine red blotch virus-infected *Vitis vinifera* L.

Am J Enol Vitic 72:307-317. doi: 10.5344/ajev.2021.21007.

**Supplemental Table 6** Response of wine composition to treatments and year.  
Data are means  $\pm$  one standard error (n = 4).

| <b>Year/Irrigation Fertilizer</b> | <b>Anthocyanins (mg/L)</b> | <b>IRP<sup>a</sup> (mg/L)</b> | <b>Tannins (mg/L)</b> |
|-----------------------------------|----------------------------|-------------------------------|-----------------------|
| <b>2019 / CON<sup>b</sup></b>     |                            |                               |                       |
| CON                               | 416 $\pm$ 16               | 406 $\pm$ 17                  | 50 $\pm$ 5            |
| SUPP                              | 411 $\pm$ 16               | 359 $\pm$ 17                  | 38 $\pm$ 5            |
| <b>2019 / SUPP</b>                |                            |                               |                       |
| CON                               | 430 $\pm$ 16               | 415 $\pm$ 17                  | 43 $\pm$ 5            |
| SUPP                              | 365 $\pm$ 16               | 459 $\pm$ 17                  | 46 $\pm$ 5            |
| <b>2020 / CON</b>                 |                            |                               |                       |
| CON                               | 215 $\pm$ 16               | 872 $\pm$ 17                  | 85 $\pm$ 5            |
| SUPP                              | 185 $\pm$ 16               | 919 $\pm$ 17                  | 131 $\pm$ 5           |
| <b>2020 / SUPP</b>                |                            |                               |                       |
| CON                               | 166 $\pm$ 16               | 954 $\pm$ 17                  | 123 $\pm$ 5           |
| SUPP                              | 218 $\pm$ 16               | 992 $\pm$ 17                  | 97 $\pm$ 5            |
| <b>ANOVA<sup>c</sup></b>          |                            | <b>p values</b>               |                       |
| Irrigation (I)                    | 0.305                      | 0.001                         | 0.755                 |
| Fertilizer (F)                    | 0.294                      | 0.135                         | 0.440                 |
| Year (Y)                          | <0.001                     | <0.001                        | <0.001                |
| I * F                             | 0.619                      | 0.136                         | 0.006                 |
| I * Y                             | 0.713                      | 0.356                         | 0.874                 |
| F * Y                             | 0.061                      | 0.102                         | 0.076                 |
| I * F * Y                         | 0.010                      | 0.070                         | <0.001                |

<sup>a</sup>IRP = iron-reactive phenolics.

<sup>b</sup>CON = Control (grower standard); SUPP = Supplemental (2x grower standard).

<sup>c</sup>ANOVA = analysis of variance.

**Supplemental Data for:**

Copp CR and Levin AD. 2021.

Irrigation improves vine physiology and fruit composition in grapevine red blotch virus-infected *Vitis vinifera* L.

Am J Enol Vitic 72:307-317. doi: 10.5344/ajev.2021.21007.

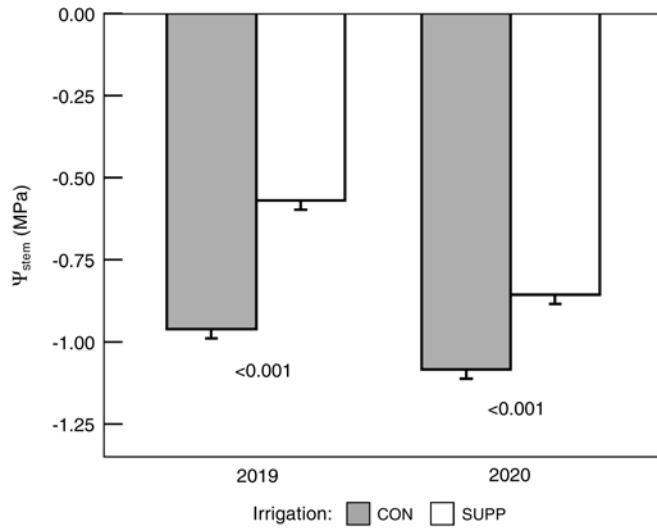

**Supplemental Figure 1** Response of stem water potential ( $\Psi_{stem}$ ) to irrigation treatments. Data are means  $\pm$  one standard error averaged across fertilizer treatments ( $n = 8$ ). The  $p$  values in the figure reflect the contrasts between irrigation treatments. CON = Control (grower standard); SUPP = Supplemental (2x grower standard).

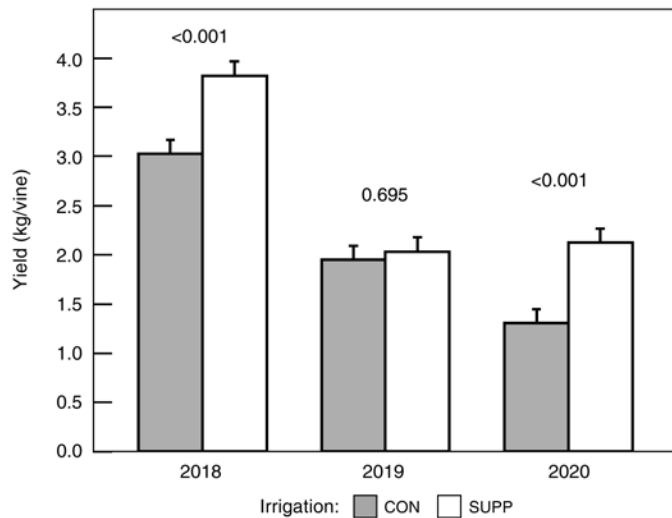

**Supplemental Figure 2** Response of yield to irrigation treatments at harvest. Data are means  $\pm$  one standard error averaged across fertilizer treatments ( $n = 8$ ). The  $p$  values in the figure reflect the contrasts between irrigation treatments. CON = Control (grower standard); SUPP = Supplemental (2x grower standard).

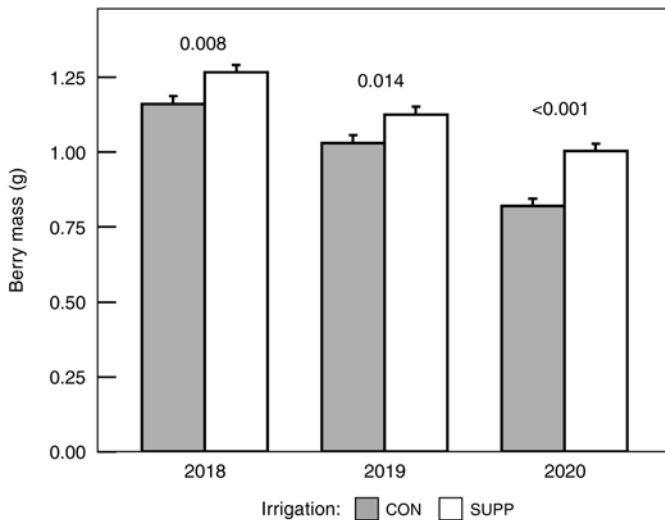

**Supplemental Figure 3** Response of berry mass to irrigation treatments at harvest. Data are means  $\pm$  one standard error averaged across fertilizer treatments ( $n = 8$ ). The  $p$  values in the figure reflect the contrasts between irrigation treatments. CON = Control (grower standard); SUPP = Supplemental (2x grower standard).
